# Supplementary material for: Diet and subsistence in Bronze Age pastoral communities from the southern Russian steppes and the North Caucasus
Source: PubMed Central journal article supplement (PMC7556513; doi:10.1371/journal.pone.0239861), 2020-10-14

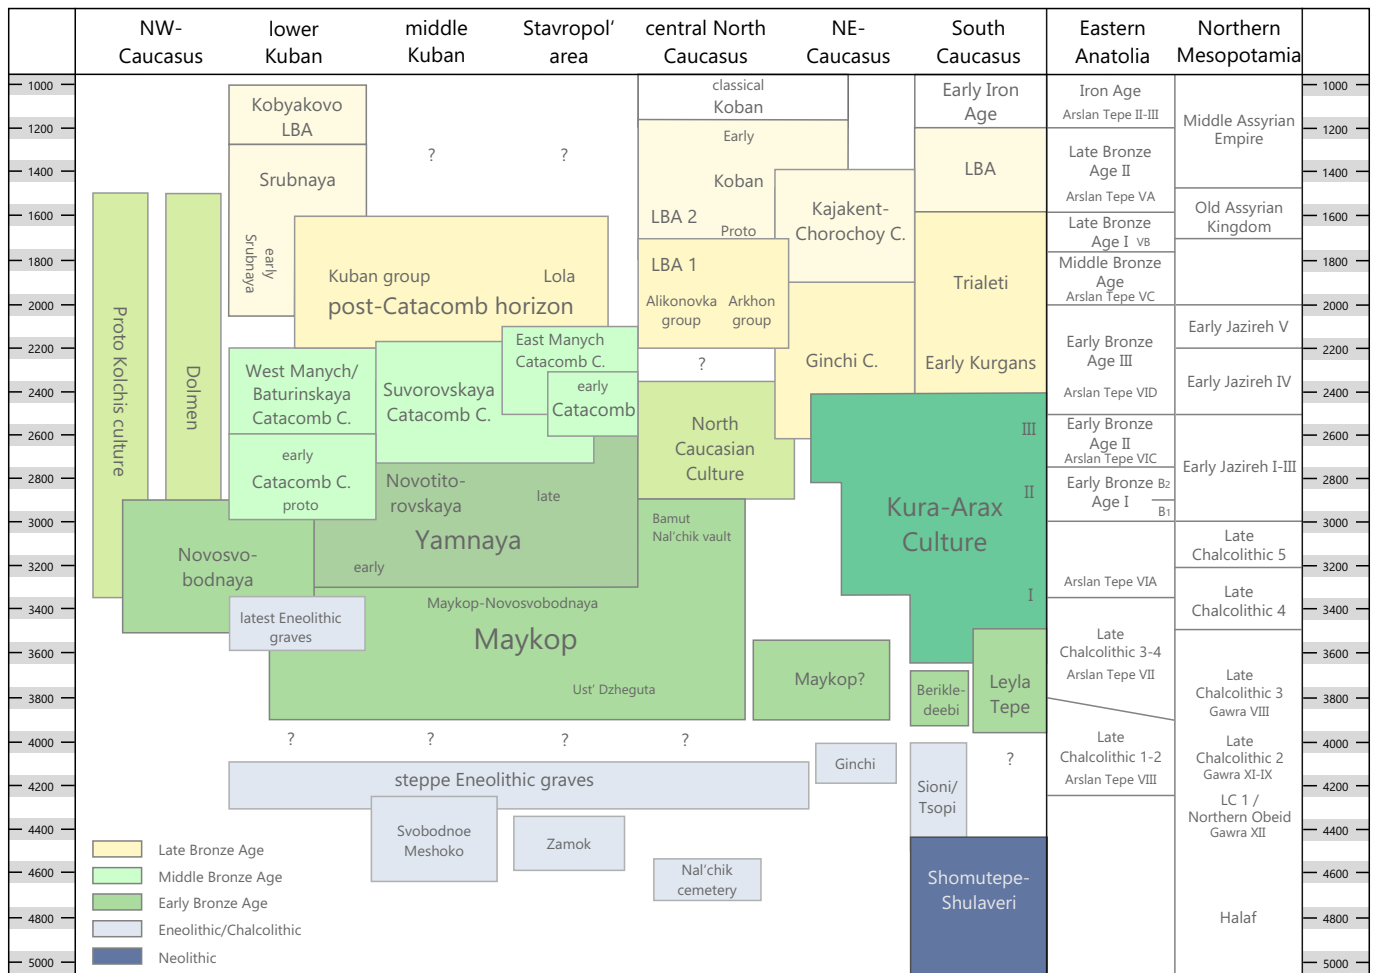

Supplement: pone.0239861.s001.pdf [file pone.0239861.s001.pdf]
